# Supplementary material
Source: MDPI journal article supplement (https://www.mdpi.com/1999-4907/13/7/1001)
Supplement: s1 [file s1 › forests-1776424-supplementary.pdf]

## Supplementary Materials

**Table S1.** Comparison in soil properties of the measuring transect (transect 1) and the other two transects (transects 2-3).

| Habitat type      | Factors                                     | Transect 1 | Transects 2-3 | P    |
|-------------------|---------------------------------------------|------------|---------------|------|
| River bank        | Soil volumetric water content (%)           | 19.08±0.86 | 16.80±1.81    | 0.18 |
|                   | Soil organic carbon (g kg <sup>-1</sup> )   | 13.20±5.70 | 10.12±1.57    | 0.50 |
|                   | Soil salinity content (g kg <sup>-1</sup> ) | 16.48±3.53 | 14.93±0.55    | 0.57 |
|                   | Soil pH                                     | 8.95±0.22  | 8.70±0.07     | 0.18 |
| Transitional zone | Soil volumetric water content (%)           | 10.11±4.95 | 6.75±4.42     | 0.41 |
|                   | Soil organic carbon (g kg <sup>-1</sup> )   | 4.16±2.14  | 2.93±1.46     | 0.44 |
|                   | Soil salinity content (g kg <sup>-1</sup> ) | 6.08±3.62  | 4.18±2.87     | 0.50 |
|                   | Soil pH                                     | 8.18±0.14  | 8.00±0.19     | 0.24 |
| Desert margin     | Soil volumetric water content (%)           | 0.76±0.22  | 1.21±0.11     | 0.06 |
|                   | Soil organic carbon (g kg <sup>-1</sup> )   | 2.09±0.95  | 1.26±0.26     | 0.30 |
|                   | Soil salinity content (g kg <sup>-1</sup> ) | 2.17±1.65  | 1.51±0.42     | 0.61 |
|                   | Soil pH                                     | 8.01±0.27  | 8.24±0.24     | 0.42 |

Values are means ± standard errors. There were no significant differences between transect 1 and transects 2-3.

**Table S2.** Multiple regression analysis of soil respiration and related influencing factors within the same plot. H<sub>max</sub>: Maximum plant height; LL: Leaf length; LT: Leaf thickness; LDMC: Leaf dry matter content; SLA: Specific leaf area; LPC: Leaf phosphorus content; SWC: Soil water content; ST: Soil temperature; pH: Soil pH; AP: Soil available phosphorus; TP: Soil total phosphorus; AN: Soil ammonium nitrogen; NN: Soil nitrate nitrogen; NS, not significant; ND, not determined (removed by the stepwise regression analysis results). \**P* < 0.05, \*\**P* < 0.01, \*\*\**P* < 0.001.

| Parameter               | Plot 1    |             | Plot 2    |             | Plot 3    |             |
|-------------------------|-----------|-------------|-----------|-------------|-----------|-------------|
|                         | 5 m × 5 m | 10 m × 10 m | 5 m × 5 m | 10 m × 10 m | 5 m × 5 m | 10 m × 10 m |
| Adjusted R <sup>2</sup> | 0.49      | 0.70        | 0.23      | 0.48        | 0.42      | 0.36        |
| P value                 | < 0.001   | < 0.001     | < 0.05    | < 0.005     | < 0.005   | < 0.001     |
| Intercept               | -2.92***  | -1.88**     | NS        | 0.30**      | 0.19**    | NS          |
| LL                      | 0.02**    | 0.01*       | ND        | ND          | -0.06*    | ND          |
| LT                      | NS        | ND          | ND        | ND          | -1.23*    | ND          |
| LDMC                    | 2.98**    | ND          | ND        | ND          | ND        | ND          |
| LPC                     | 0.52***   | NS          | 0.12*     | -0.09*      | ND        | ND          |
| SWC                     | ND        | 0.04***     | ND        | 0.06**      | ND        | 0.08***     |
| pH                      | ND        | 0.19**      | ND        | ND          | ND        | ND          |

|    |       |    |    |        |        |    |
|----|-------|----|----|--------|--------|----|
| AP | 0.01* | NS | NS | ND     | ND     | ND |
| TP | ND    | NS | ND | 0.01*  | ND     | ND |
| AN | ND    | ND | ND | -0.07* | 0.07** | ND |

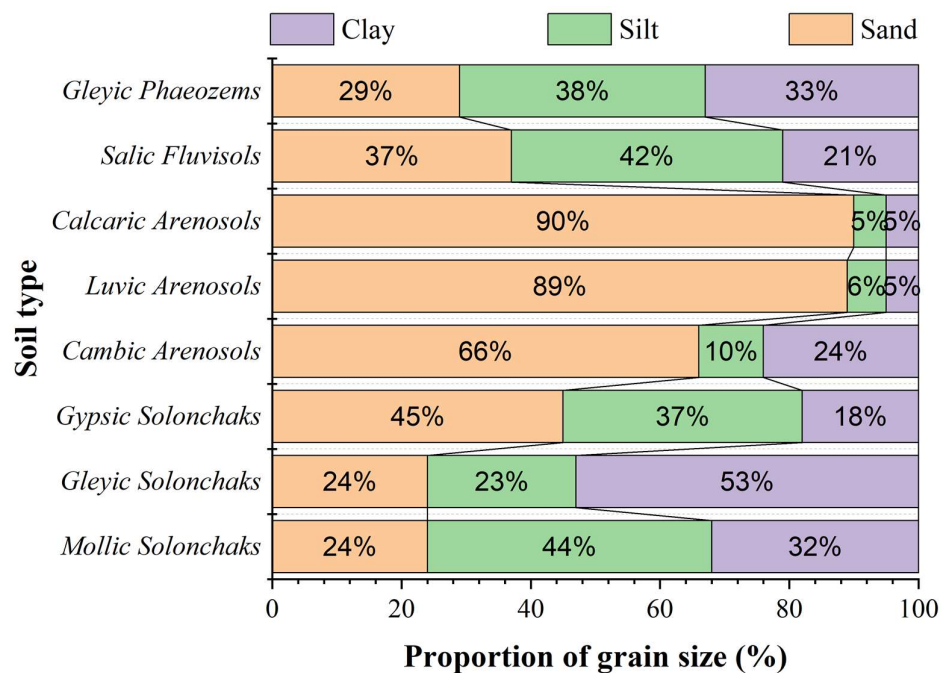

**Figure S1.** Soil types in the Ebinur Lake Wetland National Nature Reserve.

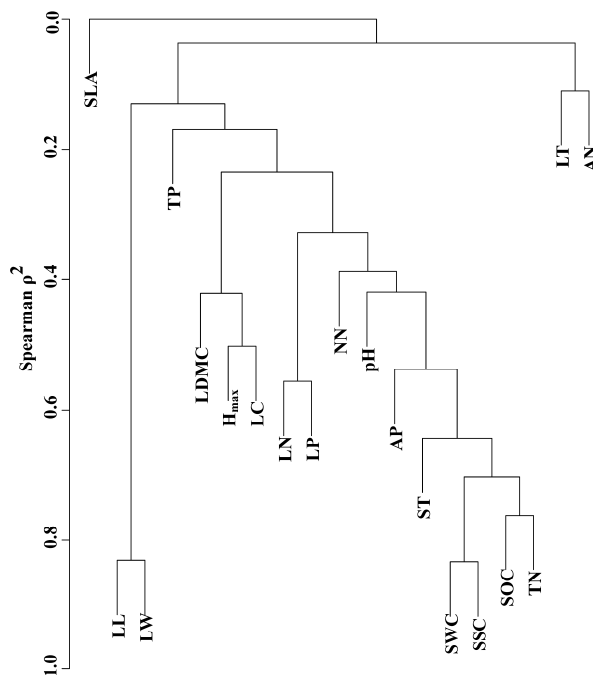

**Figure S2.** Cluster analysis of the measured environmental variables.  $H_{max}$ : Maximum plant height; LL: Leaf length; LW: Leaf width; LT: Leaf thickness; LDMC: Leaf dry matter content; SLA: Specific leaf area; LPC: Leaf phosphorus content; LNC: Leaf nitrogen content; LCC: Leaf carbon content; SWC: Soil water content; ST: Soil temperature; pH: Soil pH; AN: Soil ammonium nitrogen; AP: Soil available phosphorus; TP: Soil total

phosphorus; TN: Total nitrogen content; NN: Soil nitrate nitrogen; SSC: Soil salinity content.
